# Supplementary figures and images for: The Sec1/Munc18 protein Vps45 holds the Qa-SNARE Tlg2 in an open conformation
Source: eLife journal article supplement (doi:10.7554/elife.60724), 2020-08-17

Figure 1-figure supplement 1

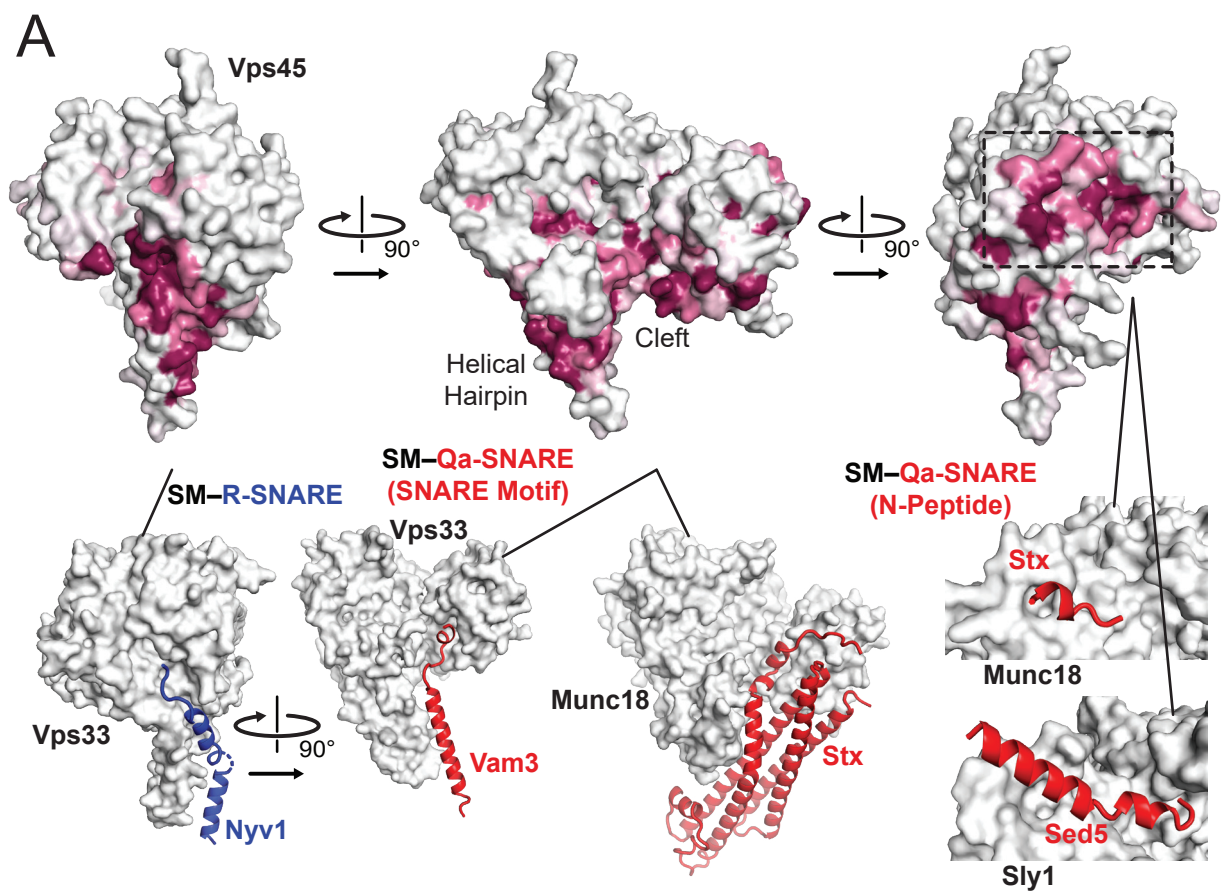

**B Tlg2 Schematic**

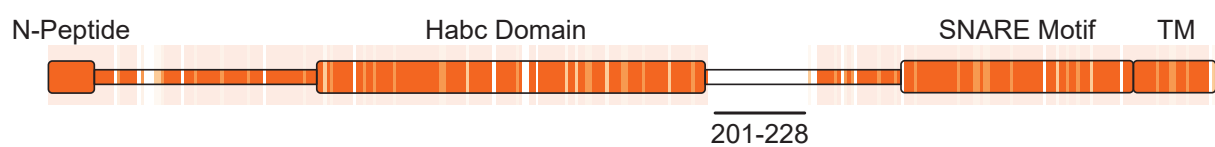

Supplement: supp [file elife-60724-supp-v1.zip]

Figure 5-figure supplement 1

MBP-Tlg2

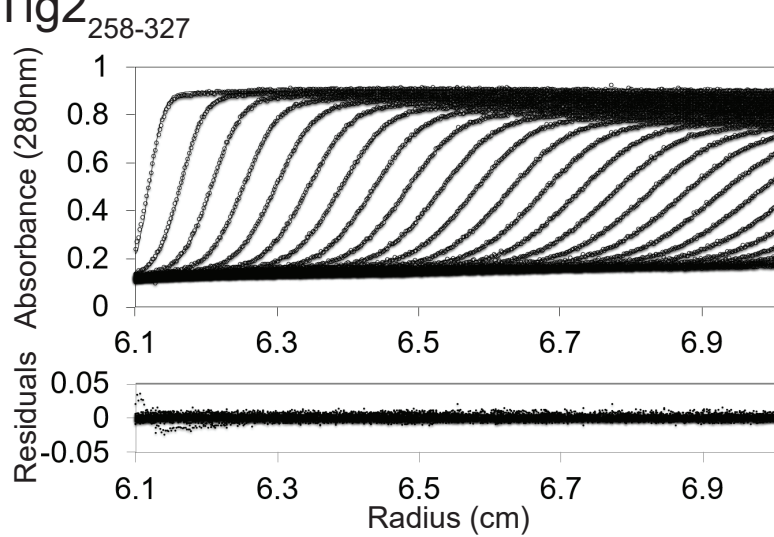

Tlg2

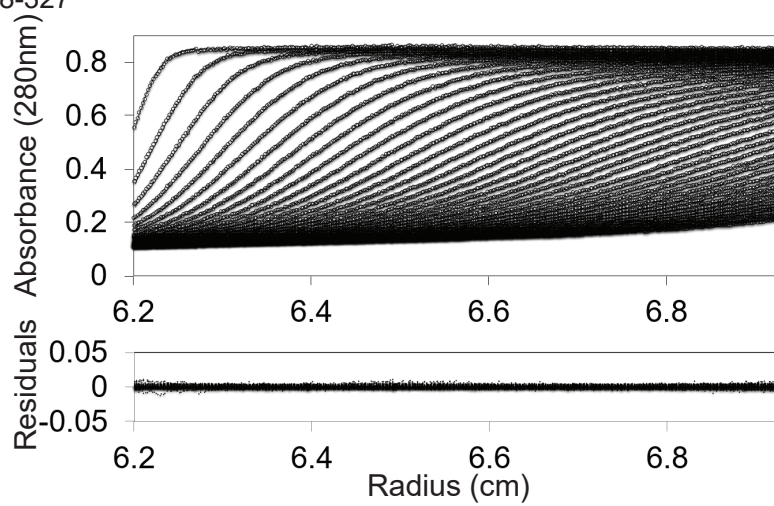

Tlg2

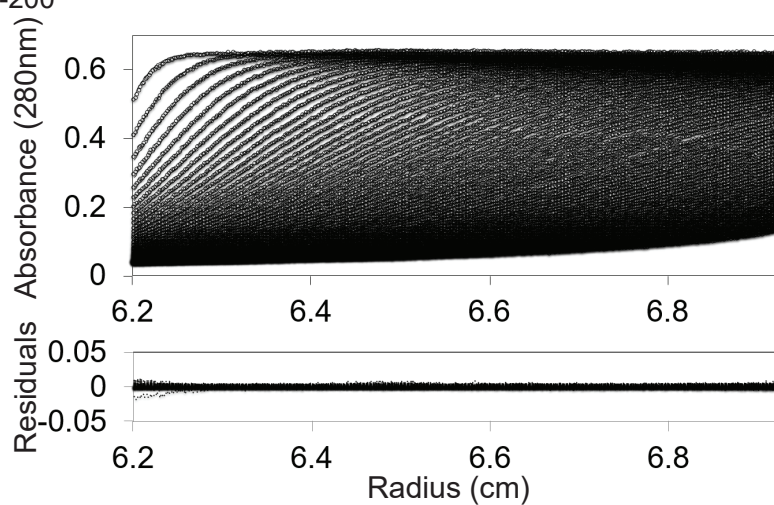

Supplement: supp [file elife-60724-supp-v1.zip]

Figure 6-figure supplement 1

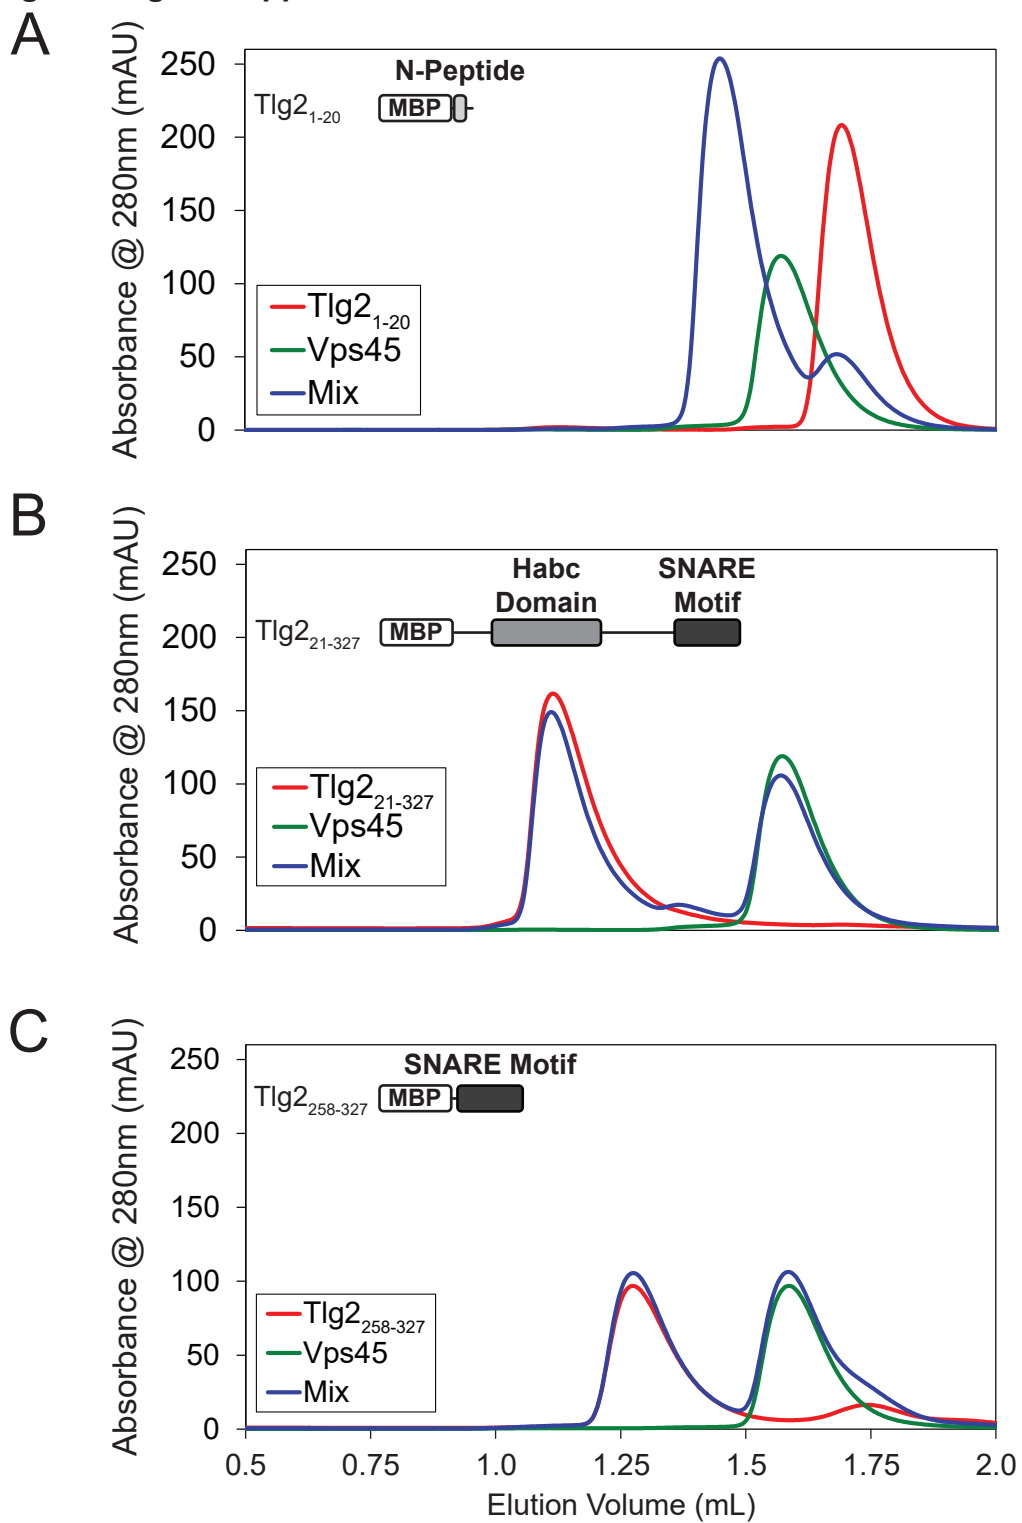

Supplement: supp [file elife-60724-supp-v1.zip]

Figure 4-figure supplement 1

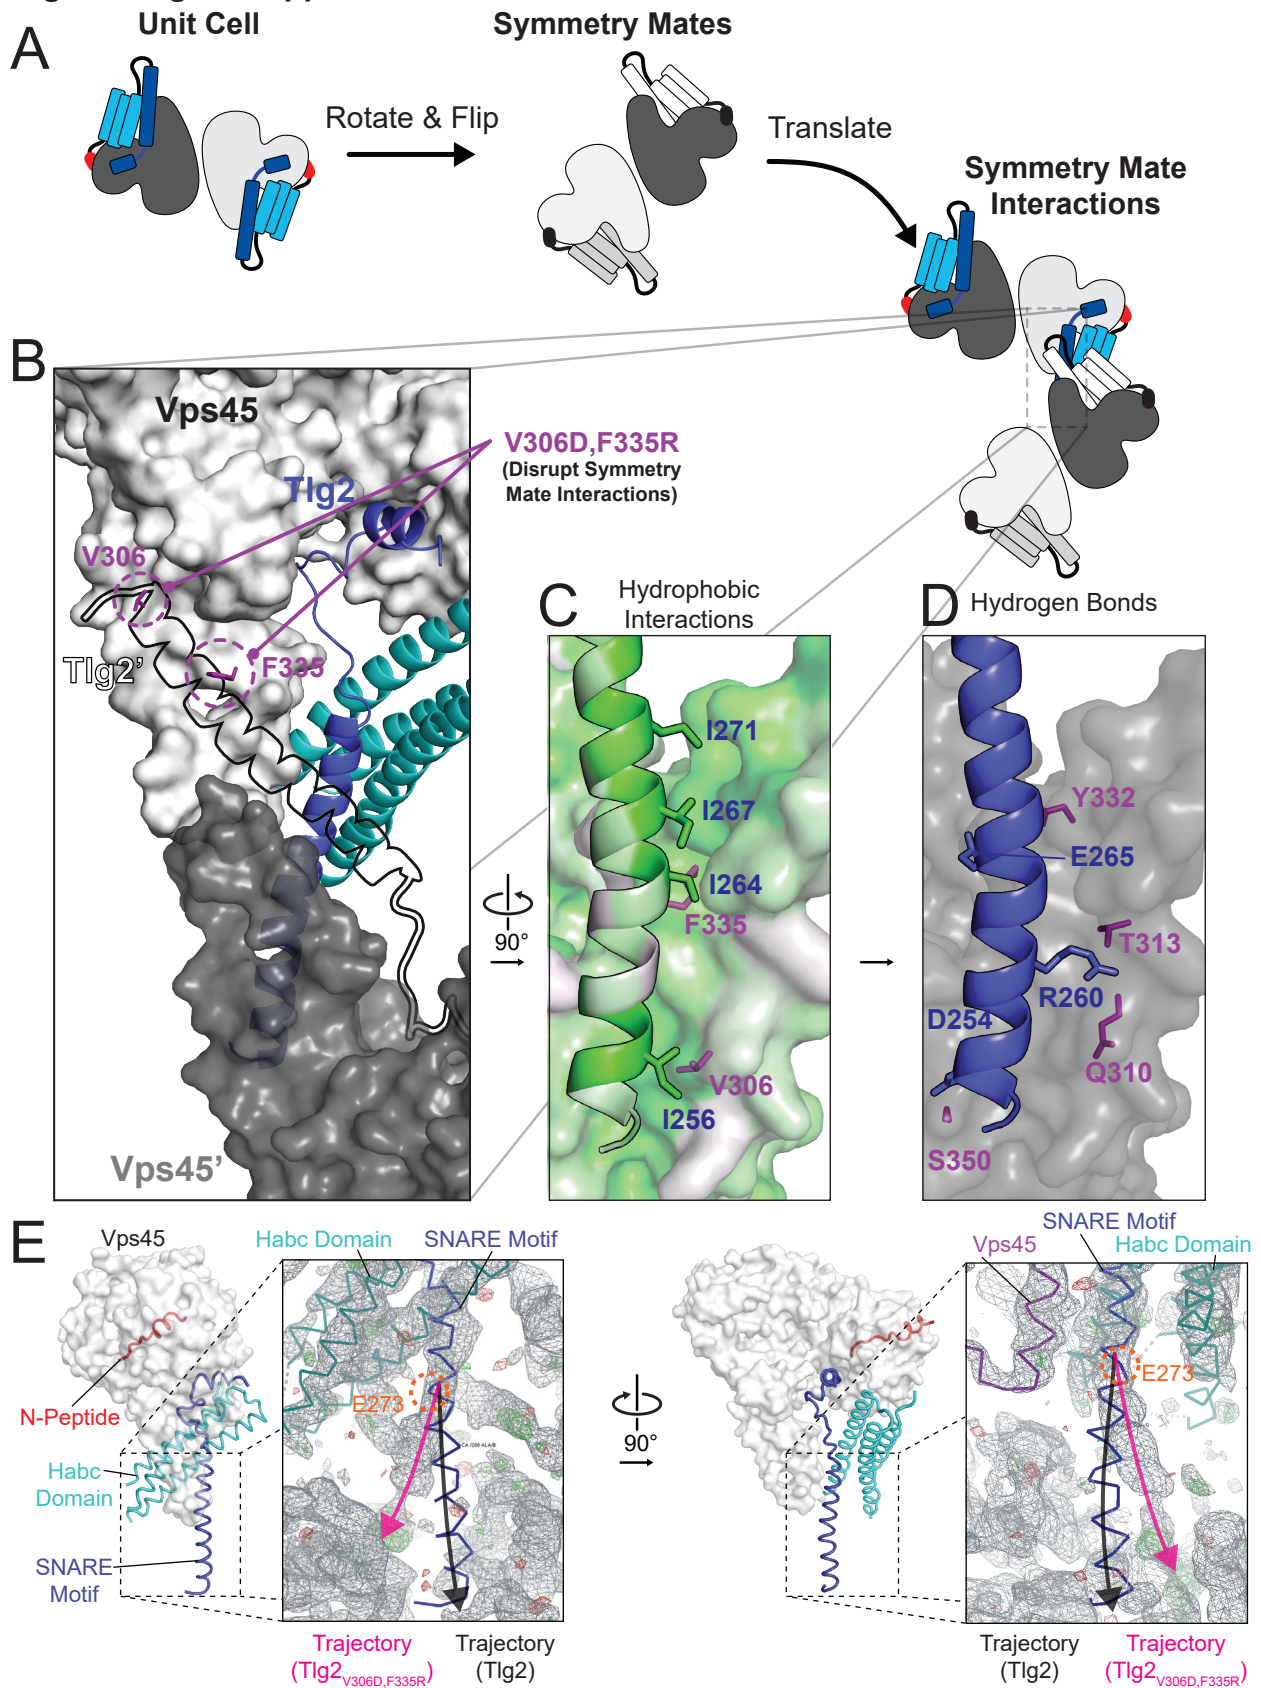

Supplement: supp [file elife-60724-supp-v1.zip]
